# Supplementary material for: Prevalences of Tobamovirus Contamination in Seed Lots of Tomato and Capsicum
Source: MDPI journal article supplement (doi:10.3390/v15040883), 2023-03-30
Supplement: s1 [file s1]

Table S1. Ranked prevalence estimates for tobamoviruses in contaminated tomato and capsicum seed lots.

| Ranking by prevalence | Virus identity | Host     | Estimated prevalence (%) | Cumulative contamination percentile | # seed tested |
|-----------------------|----------------|----------|--------------------------|-------------------------------------|---------------|
| 1                     | PMMoV          | Capsicum | 0.3880                   | 3.45                                | 12,000        |
| 2                     | ToMV           | Capsicum | 0.2080                   | 6.90                                | 10,400        |
| 3                     | ToMV           | Tomato   | 0.1080                   | 10.35                               | 12,000        |
| 4                     | ToMV           | Capsicum | 0.0891                   | 13.80                               | 12,800        |
| 5                     | ToMV           | Tomato   | 0.0693                   | 17.25                               | 17,600        |
| 6                     | PMMoV          | Capsicum | 0.0655                   | 20.70                               | 11,600        |
| 7                     | ToMV           | Capsicum | 0.0600                   | 24.15                               | 18,000        |
| 8                     | PMMoV          | Capsicum | 0.0433                   | 27.60                               | 12,000        |
| 9                     | PMMoV          | Tomato   | 0.0300                   | 31.05                               | 20,000        |
| 10                    | ToMV           | Capsicum | 0.0280                   | 34.50                               | 10,000        |
| 11                    | ToMV           | Tomato   | 0.0180                   | 37.95                               | 10,000        |
| 12                    | PMMoV          | Capsicum | 0.0150                   | 41.40                               | 12,000        |
| 13                    | PMMoV          | Capsicum | 0.0140                   | 44.85                               | 20,000        |
| 14                    | ToMV           | Capsicum | 0.0140                   | 48.30                               | 20,000        |
| 15                    | TMV            | Capsicum | 0.0080                   | 51.75                               | 20,000        |
| 16                    | PMMoV          | Capsicum | 0.0080                   | 55.20                               | 20,000        |
| 17                    | ToMMV          | Capsicum | 0.0080                   | 58.65                               | 20,000        |
| 18                    | ToMV           | Capsicum | 0.0080                   | 62.10                               | 10,000        |
| 19                    | PMMoV          | Capsicum | 0.0080                   | 65.55                               | 20,000        |
| 20                    | ToMMV          | Tomato   | 0.0080                   | 69.00                               | 20,000        |
| 21                    | ToMV           | Tomato   | 0.0077                   | 72.45                               | 10,400        |
| 22                    | PMMoV          | Capsicum | 0.0067                   | 75.90                               | 12,000        |
| 23                    | PMMoV          | Capsicum | 0.0067                   | 79.35                               | 12,000        |
| 24                    | ToMV           | Capsicum | 0.0067                   | 82.80                               | 12,000        |
| 25                    | ToMMV          | Tomato   | 0.0057                   | 86.25                               | 14,000        |
| 26                    | ToMV           | Tomato   | 0.0046                   | 89.70                               | 17,600        |
| 27                    | ToMV           | Capsicum | 0.0040                   | 93.15                               | 20,000        |
| 28                    | ToMV           | Tomato   | 0.0040                   | 96.60                               | 20,000        |
| 29                    | ToMV           | Tomato   | 0.0040                   | 100.05                              | 20,000        |
